# Supplementary material for: Expression of ISG15 in colorectal cancer and exploration of its mechanism of action
Source: Research Square preprint supplement (doi:10.21203/rs.3.rs-6948484/v1), 2025-08-25
Supplement: Supplementary file 1 [file 38ccd4a21363548013cab600.docx]

Data availability statements

The datasets generated and analysed during the current study are not publicly available due to the topic needs to be studied in a more in-depth manner.But are available from the corresponding author on reasonable request.
